# Supplementary material for: High-Performance CVD Bilayer MoS2 Radio Frequency Transistors and Gigahertz Mixers for Flexible Nanoelectronics
Source: MDPI journal article supplement (doi:10.3390/mi12040451), 2021-04-16
Supplement: s1 [file s1]

## Article

# High-Performance CVD Bilayer MoS<sub>2</sub> Radio Frequency Transistors and Gigahertz Mixers for Flexible Nanoelectronics

Qingguo Gao <sup>1,2</sup>, Chongfu Zhang <sup>1,2,\*</sup>, Kaiqiang Yang <sup>1</sup>, Xinjian Pan <sup>1</sup>, Zhi Zhang <sup>1</sup>, Jianjun Yang <sup>1</sup>, Zichuan Yi <sup>1</sup>, Feng Chi <sup>1</sup> and Liming Liu <sup>1</sup>

<sup>1</sup> School of Electronic Information, University of Electronic Science and Technology of China, Zhongshan Institute, Zhongshan 528402, China; gqgemw@163.com (Q.G.); 201811022515@std.uestc.edu.cn (K.Y.); xinjianpan@163.com (X.P.); zz001@zsc.edu.cn (Z.Z.); sdyman@uestc.edu.cn (J.Y.); yizichuan@zsc.edu.cn (Z.Y.); chifeng@semi.ac.cn (F.C.); limingliu@uestc.edu.cn (L.L.)

<sup>2</sup> School of Information and Communication Engineering, University of Electronic Science and Technology of China, Chengdu 611731, China

\* Correspondence: cfzhang@uestc.edu.cn

## S1 XPS analysis

Figure S1 shows the X-ray photoelectron spectroscopy (XPS) of the CVD grown MoS<sub>2</sub>. In Fig. S1(a), the XPS spectra shows two peaks at 230.3 and 233.4 eV, corresponding to the Mo 3d<sub>5/2</sub> and Mo 3d<sub>3/2</sub> state, respectively. As shown in Figure S1(b), the binding energy for S 2p<sub>3/2</sub> and S 2p<sub>1/2</sub> are 163.2 and 164.4 eV. The data of Mo 3d, and S 2p states are in agreement with the reported data of MoS<sub>2</sub> samples with 2H crystalline structure[1,2]. The atomic concentration of Mo (3d) to S (2p) in MoS<sub>2</sub> was estimated to be 34.36 to 65.64, respectively.

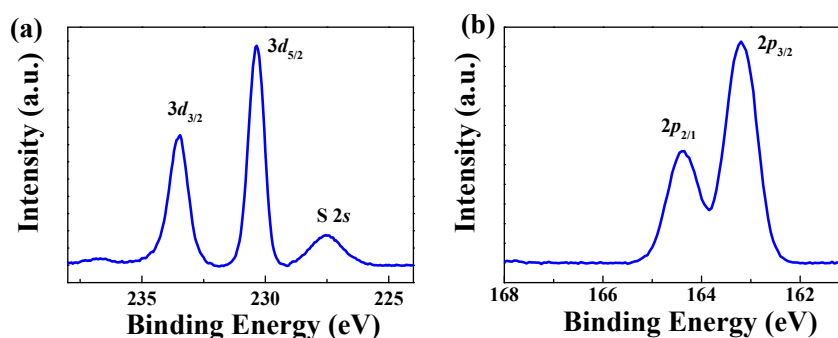

**Figure S1.** (a) The XPS spectra of the Mo 3d state, (b) S 2s state.

## References

1. Lee, Y.; Lee, J.; Bark, H.; Oh, I.-K.; Ryu, G.H.; Lee, Z.; Kim, H.; Cho, J.H.; Ahn, J.-H.; Lee, C., Synthesis of wafer-scale uniform molybdenum disulfide films with control over the layer number using a gas phase sulfur precursor, *Nanoscale* **2014**, *6*, 2821–2826.
2. Park, S.J.; Chu, D.; Kim, E.K., Controllable Growth of Single Layer MoS<sub>2</sub> and Resistance Switching Effect in Polymer/MoS<sub>2</sub> Structure, *Appl. Sci. Conver. Technol.* **2017**, *26*, 129–132.
